# Supplementary material
Source: PubMed Central journal article supplement (PMC2803229)

## Legends for supplemental figures

### **fig. S1. Contribution of N-linked glycosylation to the subcellular distribution of NCEH**

Wild-type or mutant NCEH containing all of N270Q, N367Q and N389Q was expressed as a GFP fusion protein in HeLa cells. NCEH-myc was expressed and immunostained as in Fig. 5. The intercellular localization of these GFP fusion proteins was compared with that of NCEH-myc. Images were acquired with a confocal microscope (Leica) using an argon laser and a 100× objective. Data are representative of three independent experiments.

### **fig. S2. Site-directed mutagenesis of catalytic sites in NCEH.**

Whole cell lysate was prepared from HEK293 cells transfected with wild-type or mutant NCEH containing G114A or S191A. The lysate was subjected to measurements of enzymatic activity using PNPB as a substrate (**B**) and a Western blot analysis with anti-NCEH antibody (**A**). Data are expressed as means ± S.E. for three independent measurements. (\*,  $P < 0.01$ , compared with WT NCEH).

### **fig. S3. Subcellular distribution of GFP fusion proteins**

HEK 293 cells transfected with GFP, NCEH-GFP or NCEH<sub>1-33</sub>-GFP were fractionated as described in Materials and Methods and analyzed by Western blotting with anti-GFP antibody.

**fig. S4. Regulation of HSL and NCEH by phosphorylation**

HEK293 cells transfected with FLAG-NCEH or FLAG-HSL were preincubated in Krebs-Ringer buffer for 6 h and subsequently incubated in 1 ml of Krebs-Ringer buffer containing 0.5 mCi [<sup>32</sup>P] orthophosphate for 1 h, and then in the presence or absence of a PKA activator, forskolin (20 μM) for 30 min. Cells were suspended in buffer A containing 1% (v/v) TritonX-100 and centrifuged. Next, 0, 30 or 60 μg of the supernatant was immunoprecipitated with 5 μg of mouse anti-FLAG monoclonal antibody. After SDS-PAGE, the supernatant was immunoblotted by mouse anti-FLAG monoclonal antibody (A). Alternatively, the gels were dried, and autoradiographed with a Phosphoimager Screen (B). Data are representative of two independent experiments.

(C) Whole cell lysate of HEK293 cells overexpressing NCEH or HSL was incubated with the indicated concentration of cAMP in 250 mM sucrose, 0.5 mM ATP, 1.25 mM MgCl<sub>2</sub>, and 50 mM Tris-HCl, pH 7.0, for 30 min at 37 °C. Activation was stopped by the addition of an equal volume of substrate mixture containing excess

EDTA (6.25 mM), and NCEH activity was assayed for 1 h at 37 °C. Data are expressed as means  $\pm$  S.E. of three measurements and are representative of three independent experiments. (\*,  $P < 0.001$ , compared with 0  $\mu$ M cAMP)

**fig.S1**

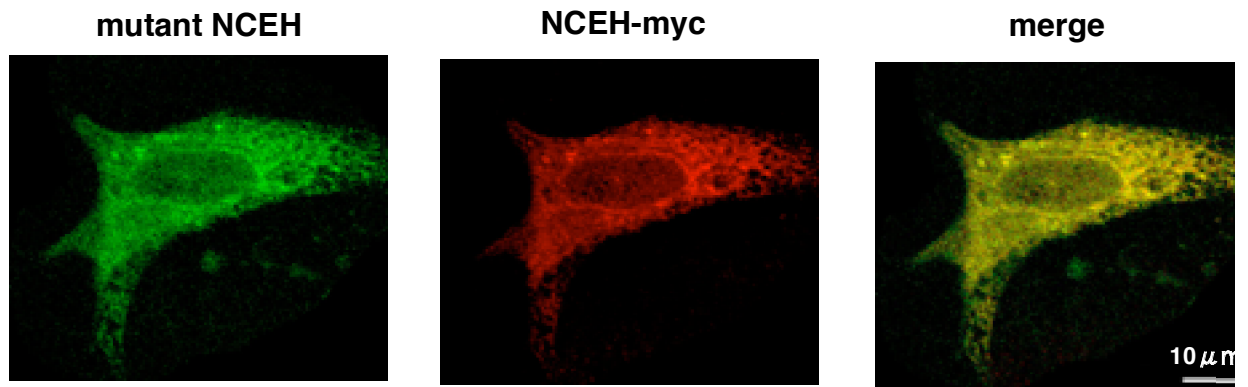

fig.S2

A.

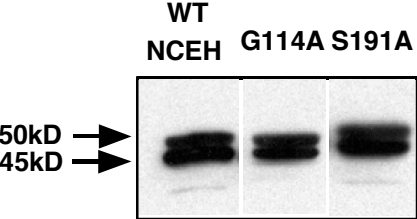

B.

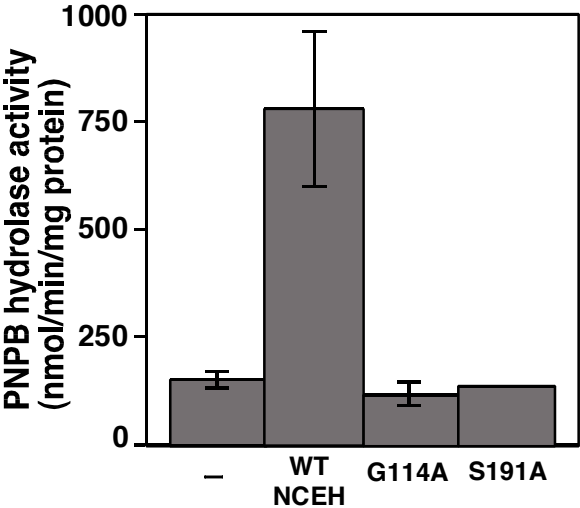

**fig.S3**

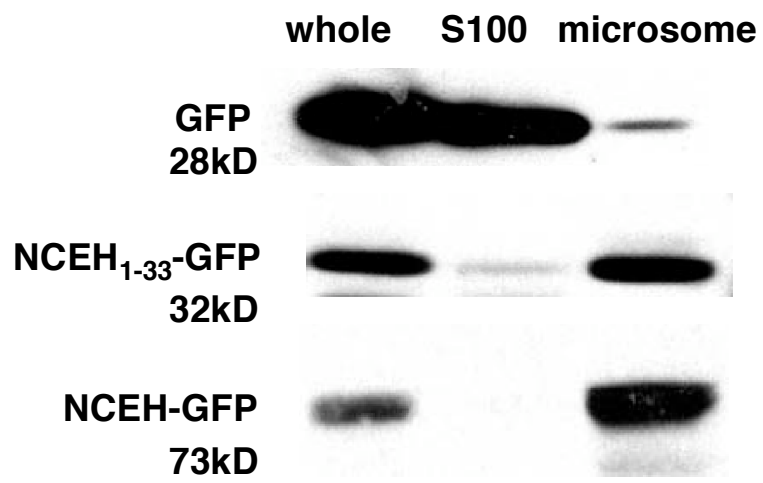

Fig.S4

A.

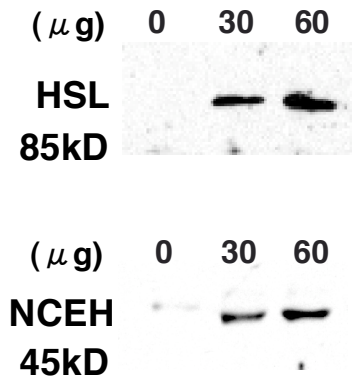

B.

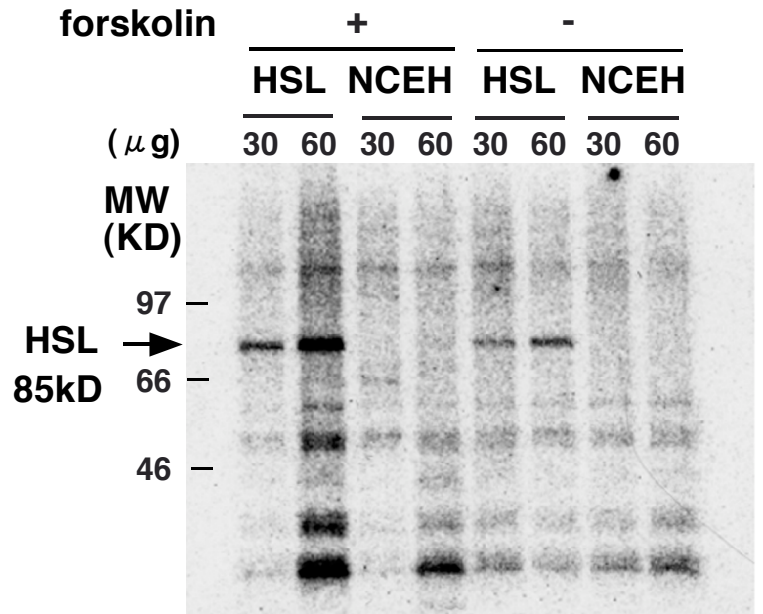

C.

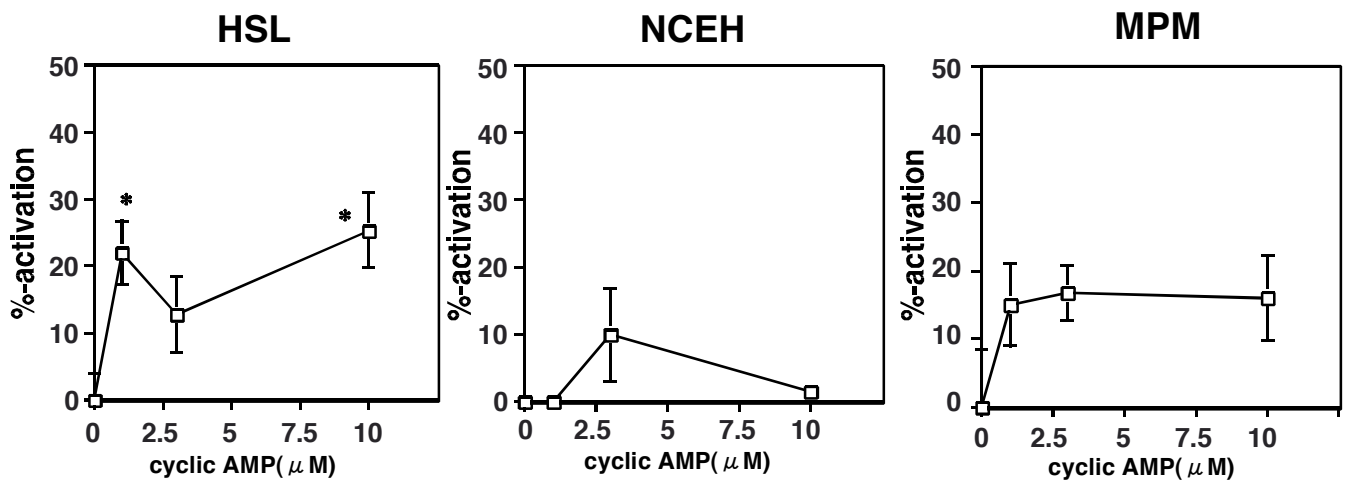

Supplement: supp_M900201-JLR200_Suppdata.pdf [file supp_M900201-JLR200_Suppdata.pdf]
